# Supplementary material
Source: PubMed Central journal article supplement (PMC5826047)
Supplement: joces-131-210245-s1.pdf [file joces-131-210245-s1.pdf]

## Supplementary Material

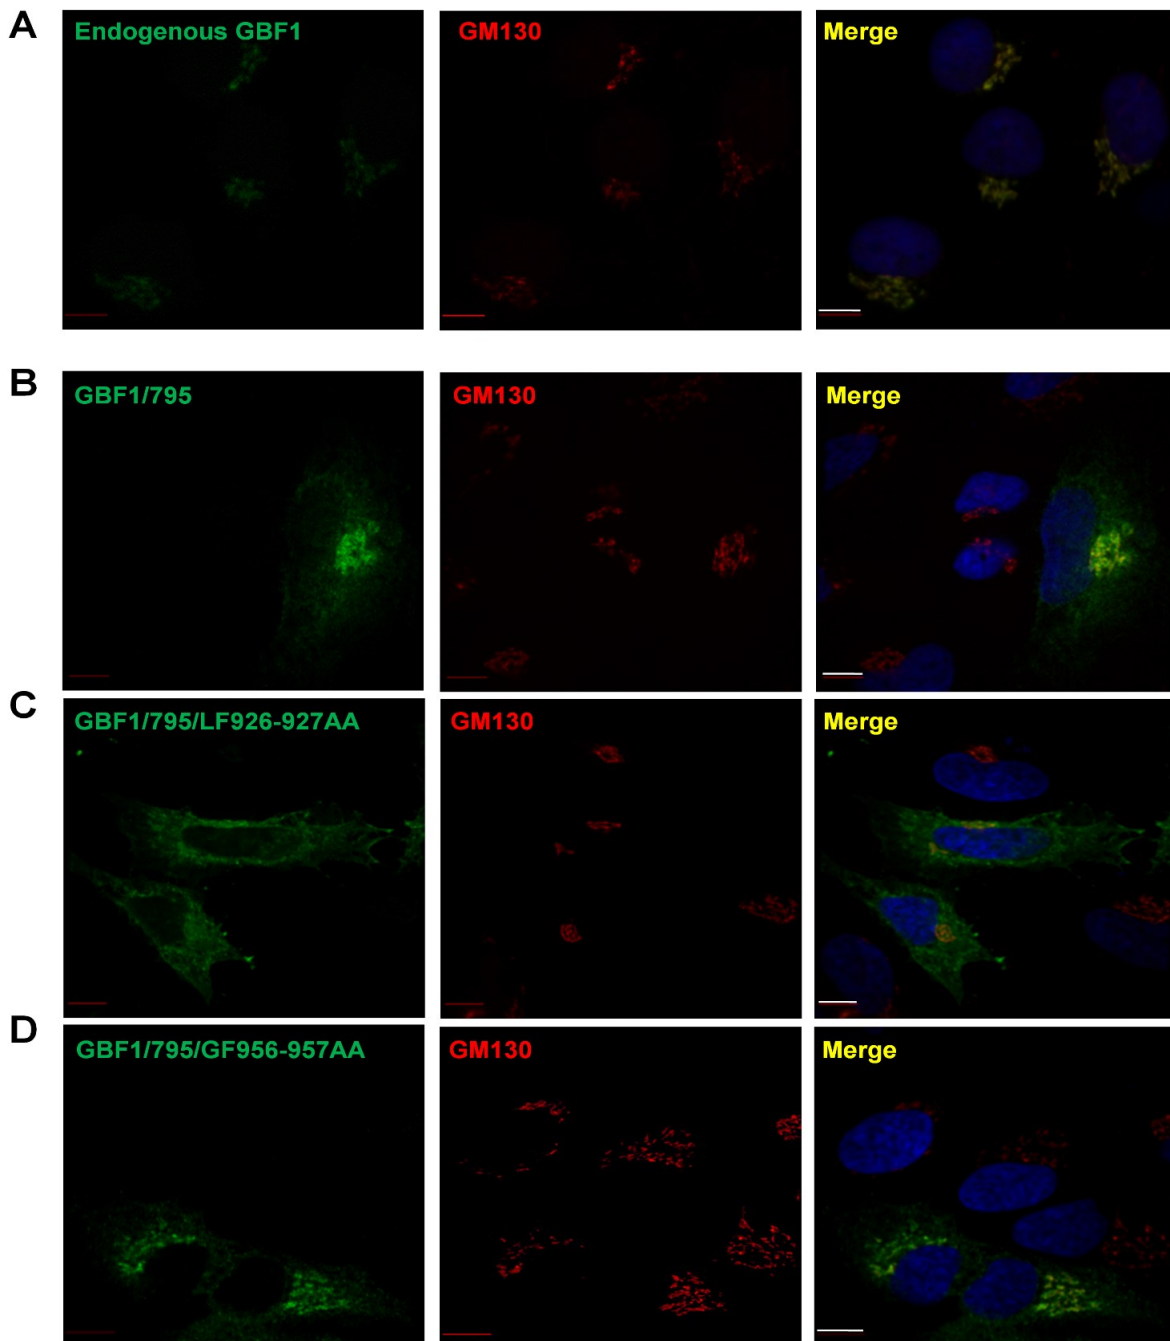

**Figure S1. Specific motifs in HDS1 regulate Golgi recruitment of GBF1**

HeLa cells expressing the indicated construct were processed for IF with anti-GFP and anti-GM130. Bar represents 7 μm.

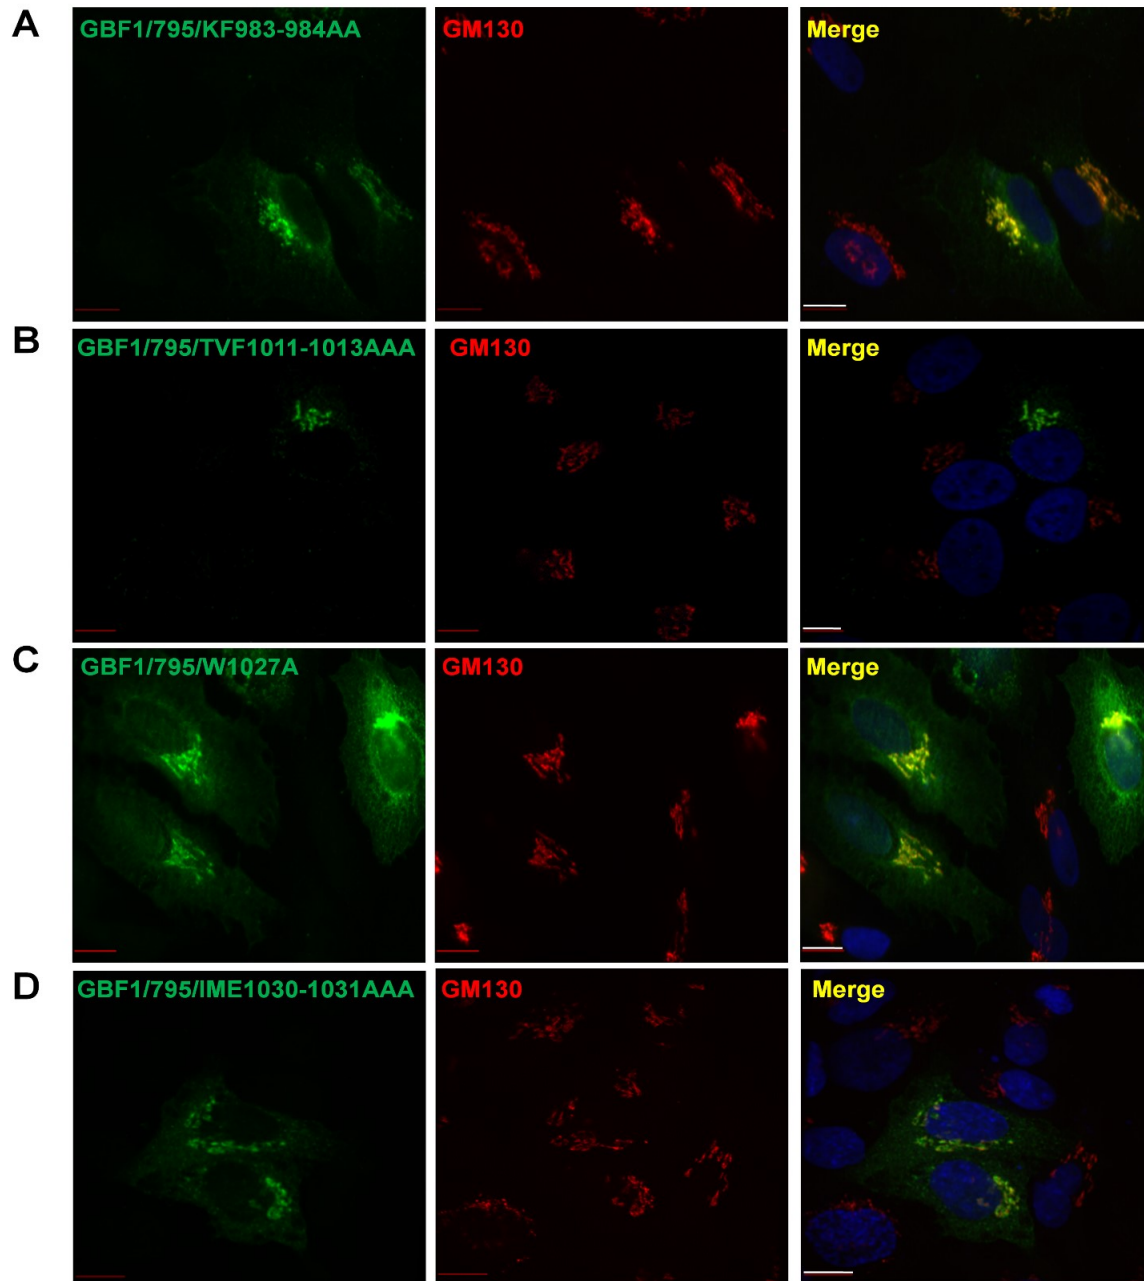

**Figure S2. Specific motifs in HDS1 regulate Golgi recruitment of GBF1**

HeLa cells expressing the indicated construct were processed for IF with anti-GFP and anti-GM130. Bar represents 7  $\mu$ m.
